# Supplementary material for: Cross-validation of four different survey methods used to estimate illicit cigarette consumption in Brazil
Source: HighWire-hosted journal article supplement (doi:10.1136/tobaccocontrol-2020-056060), 2020-11-13
Supplement: tobaccocontrol-2020-056060supp001_data_supplement.pdf [file tobaccocontrol-2020-056060supp001_data_supplement.pdf]

Supplementary Figure 1. Distribution of the average monthly amount of household garbage collected and the number of adult smokers living in the planning areas<sup>1,2</sup>. Rio de Janeiro city, 2018.

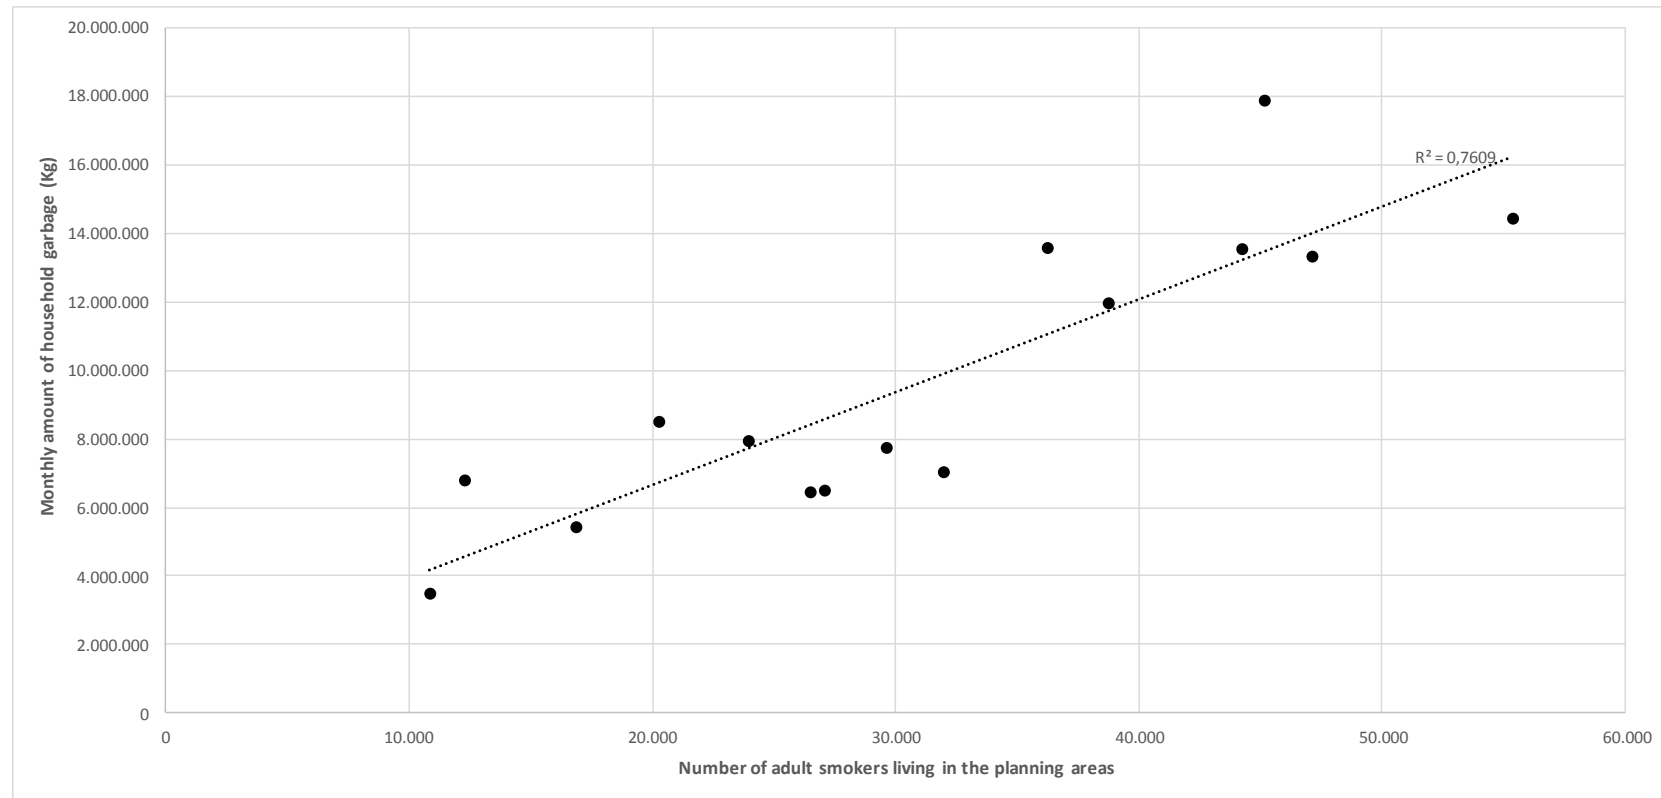

<sup>1</sup> Each of the 15 planning areas of the city of Rio de Janeiro are comprised of geographically-bounded neighborhoods

<sup>2</sup> Pearson correlation coefficient: 0.87
