# Supplementary material for: Cross-validation of four different survey methods used to estimate illicit cigarette consumption in Brazil
Source: HighWire-hosted journal article supplement (doi:10.1136/tobaccocontrol-2020-056060), 2020-11-13
Supplement: tobaccocontrol-2020-056060supp004_data_supplement.pdf [file tobaccocontrol-2020-056060supp004_data_supplement.pdf]

Supplementary Table 1. Distribution of smokers by socio-demographic variables and nicotine-dependent characteristics. *FTF-household* survey (2019) and National Health Survey (*PNS*) (2013)<sup>1</sup>. Rio de Janeiro and São Paulo cities.

| Characteristics                                             | <i>FTF-household</i> survey original sample |             |                        |             | <i>FTF-household</i> survey based on smokers who reported having bought at least one cigarette pack in their last purchase and accepted to show the pack |             |                        |             | Expected smoking population <sup>1</sup> |             |                        |             |
|-------------------------------------------------------------|---------------------------------------------|-------------|------------------------|-------------|----------------------------------------------------------------------------------------------------------------------------------------------------------|-------------|------------------------|-------------|------------------------------------------|-------------|------------------------|-------------|
|                                                             | São Paulo (n=772)                           |             | Rio de Janeiro (n=780) |             | São Paulo (n=598)                                                                                                                                        |             | Rio de Janeiro (n=680) |             | São Paulo (n=393)                        |             | Rio de Janeiro (n=199) |             |
|                                                             | %                                           | (CI 95%)    | %                      | (CI 95%)    | %                                                                                                                                                        | (CI 95%)    | %                      | (CI 95%)    | %                                        | (CI 95%)    | %                      | (CI 95%)    |
| <b>Sex</b>                                                  |                                             |             |                        |             |                                                                                                                                                          |             |                        |             |                                          |             |                        |             |
| Male                                                        | 54.9                                        | (53.6-56.2) | 53.5                   | (52.3-54.7) | 53.0                                                                                                                                                     | (50.6-55.5) | 52.4                   | (50.7-54.1) | 49.5                                     | (43.0-55.9) | 52.2                   | (44.3-60.1) |
| <b>Age group (years)</b>                                    |                                             |             |                        |             |                                                                                                                                                          |             |                        |             |                                          |             |                        |             |
| 18 - 24                                                     | 15.0                                        | (13.9-16.2) | 17.6                   | (16.7-18.5) | 12.3                                                                                                                                                     | (10.8-14.1) | 16.3                   | (15.1-17.6) | 11.8                                     | (8.1-16.8)  | 18.4                   | (12.4-26.5) |
| 25 - 34                                                     | 23.7                                        | (22.3-25.2) | 16.4                   | (15.5-17.3) | 23.4                                                                                                                                                     | (21.2-25.8) | 16.2                   | (14.8-17.6) | 23.2                                     | (37.1-49.9) | 14.3                   | (35.4-52.1) |
| 35 - 54                                                     | 42.1                                        | (40.5-43.7) | 47.1                   | (45.9-48.4) | 43.9                                                                                                                                                     | (41.6-46.3) | 48.6                   | (46.9-50.3) | 41.2                                     | (16.5-25.7) | 43.5                   | (9.8-20.3)  |
| ≥ 55                                                        | 19.2                                        | (17.5-21.1) | 18.9                   | (17.8-20.0) | 20.3                                                                                                                                                     | (18.1-22.7) | 18.9                   | (17.5-20.5) | 23.9                                     | (19.2-29.2) | 23.8                   | (18.4-30.1) |
| <b>Years of schooling</b>                                   |                                             |             |                        |             |                                                                                                                                                          |             |                        |             |                                          |             |                        |             |
| ≥ High School                                               | 48.0                                        | (43.6-52.5) | 42.5                   | (37.8-47.4) | 49.2                                                                                                                                                     | (44.5-54.0) | 44.4                   | (39.5-49.3) | 50.0                                     | (43.7-56.3) | 54.7                   | (46.1-63.2) |
| <b>Tobacco Behavior</b>                                     |                                             |             |                        |             |                                                                                                                                                          |             |                        |             |                                          |             |                        |             |
| <b>Smoking frequency</b>                                    |                                             |             |                        |             |                                                                                                                                                          |             |                        |             |                                          |             |                        |             |
| Daily                                                       | 92.6                                        | (90.3-94.4) | 93.7                   | (91.3-95.5) | 95.5                                                                                                                                                     | (93.5-96.9) | 95.6                   | (93.3-97.1) | 89.5                                     | (85.2-92.6) | 88.9                   | (83.6-92.7) |
| <b>Cigarettes per day</b>                                   |                                             |             |                        |             |                                                                                                                                                          |             |                        |             |                                          |             |                        |             |
| 1-10                                                        | 42.2                                        | (37.4-47.2) | 41.5                   | (37.1-46.0) | 37.5                                                                                                                                                     | (32.6-42.7) | 39.3                   | (34.6-44.3) | 56.4                                     | (50.3-62.3) | 51.3                   | (42.8-59.7) |
| 11-20                                                       | 47.5                                        | (43.0-52.0) | 47.4                   | (43.0-51.8) | 52.0                                                                                                                                                     | (47.2-56.7) | 49.5                   | (44.9-54.1) | 38.2                                     | (32.5-44.2) | 38.9                   | (31.3-47.1) |
| ≥ 21                                                        | 10.3                                        | (8.3-12.8)  | 11.2                   | (8.6-14.4)  | 10.5                                                                                                                                                     | (8.3-13.2)  | 11.2                   | (8.5-14.6)  | 5.5                                      | (3.3-9.0)   | 9.8                    | (6.0-15.7)  |
| <b>Time to first cigarette after waking up <sup>2</sup></b> |                                             |             |                        |             |                                                                                                                                                          |             |                        |             |                                          |             |                        |             |
| ≤ 5                                                         | 31.3                                        | (27.4-35.4) | 30.1                   | (26.4-34.1) | 34.5                                                                                                                                                     | (30.2-39.1) | 31.3                   | (27.4-35.4) | 23.5                                     | (18.3-29.6) | 22.0                   | (15.3-30.6) |
| 6 - 30                                                      | 32.8                                        | (29.0-36.9) | 35.6                   | (31.7-39.7) | 33.5                                                                                                                                                     | (29.2-38.0) | 35.9                   | (31.8-40.3) | 33.0                                     | (27.1-40.0) | 33.3                   | (25.5-42.1) |
| ≥ 31                                                        | 35.9                                        | (32.4-39.6) | 34.3                   | (30.2-38.7) | 32.0                                                                                                                                                     | (27.9-36.4) | 32.8                   | (28.2-37.6) | 43.3                                     | (37.1-49.7) | 44.7                   | (35.9-53.9) |

<sup>1</sup> based on the National Health Survey conducted in 2013; <sup>2</sup> daily smokers only; n.avail. = not available
