# Supplementary material for: Cross-validation of four different survey methods used to estimate illicit cigarette consumption in Brazil
Source: HighWire-hosted journal article supplement (doi:10.1136/tobaccocontrol-2020-056060), 2020-11-13
Supplement: tobaccocontrol-2020-056060supp006_data_supplement.pdf [file tobaccocontrol-2020-056060supp006_data_supplement.pdf]

Supplementary Table 3. Proportion of illicit cigarette consumption<sup>1</sup> by level of education, average daily cigarette consumption, and time to first cigarette. *FTF-householdbrandcigarette* and *Vigitel-cigarette* surveys. São Paulo and Rio de Janeiro cities, 2019.

| Characteristics                                           | <i>FTF-householdbrandcigarette</i> survey <sup>2</sup> |             |                |             | <i>VIGITEL</i> survey <sup>3</sup> |             |                |             |
|-----------------------------------------------------------|--------------------------------------------------------|-------------|----------------|-------------|------------------------------------|-------------|----------------|-------------|
|                                                           | São Paulo                                              |             | Rio de Janeiro |             | São Paulo                          |             | Rio de Janeiro |             |
|                                                           | %                                                      | CI. 95%     | %              | CI 95%      | %                                  | CI 95%      | %              | CI. 95%     |
| <b>Total</b>                                              | 40.7                                                   | (34.3-47.0) | 29.9           | (23.3-36.5) | 20.1                               | (6.3-33.9)  | 9.3            | (3.7-14.9)  |
| <b>Years of schooling</b>                                 |                                                        |             |                |             |                                    |             |                |             |
| ≥ 8                                                       | 34.4                                                   | (27.5-41.4) | 26.2           | (19.0-33.4) | 15.0                               | (0.01-32.8) | 5.8            | (1.2-10.4)  |
| < 8                                                       | 54.4                                                   | (43.9-64.9) | 38.1           | (28.2-48.0) | 35.4                               | (14.7-56.2) | 19.2           | (2.0-36.3)  |
| <b>Cigarettes per day</b>                                 |                                                        |             |                |             |                                    |             |                |             |
| 1-10                                                      | 29.5                                                   | (22.3-36.7) | 29.7           | (21.8-37.7) | 8.4                                | (1.4-15.5)  | 4.6            | (0.001-9.7) |
| ≥11                                                       | 42.9                                                   | (35.8-50.0) | 29.9           | (22.7-37.2) | 23.4                               | (4.9-41.7)  | 14.3           | (4.1-24.5)  |
| <b>Time to first cigarettes after waking up (minutes)</b> |                                                        |             |                |             |                                    |             |                |             |
| ≤ 5                                                       | 45.9                                                   | (36.5-55.4) | 36.8           | (26.6-47.1) | n.avail                            | n.avail     | n.avail        | n.avail     |
| 6 - 30                                                    | 38.8                                                   | (29.6-47.9) | 25.0           | (18.1-31.9) | n.avail                            | n.avail     | n.avail        | n.avail     |
| ≥31                                                       | 32.7                                                   | (23.2-42.3) | 23.7           | (15.2-32.2) | n.avail                            | n.avail     | n.avail        | n.avail     |

<sup>1</sup> based on direct observation of the pack among smokers who showed the pack of their last purchase; <sup>2</sup> the number of smokers who showed the packs of their last purchase were, as follows: for the *FTF-householdbrandcigarette*. Rio de Janeiro (680) and São Paulo (598); <sup>3</sup> the overall number of smokers who provided information on the amount and price paid in their last purchase was, as follows: Rio de Janeiro (154) and São Paulo (188); n.avail. = not available.
